# Supplementary material
Source: publisher figshare collection journal article supplement (https://geolsoc.figshare.com/ndownloader/files/26880120)
Supplement: Supplementary file 1 [file 26880120]

## Sheet: Sheet1
Grain ID	Sample	P_ppm_m31	P_ppm_m31_Int2SE	Cl_ppm_m35	Cl_ppm_m35_Int2SE	V_ppm_m51	V_ppm_m51_Int2SE	Mn_ppm_m55	Mn_ppm_m55_Int2SE	Sr_ppm_m88	Sr_ppm_m88_Int2SE	Y_ppm_m89	Y_ppm_m89_Int2SE	Zr_ppm_m90	Zr_ppm_m90_Int2SE	La_ppm_m139	La_ppm_m139_Int2SE	Ce_ppm_m140	Ce_ppm_m140_Int2SE	Pr_ppm_m141	Pr_ppm_m141_Int2SE	Nd_ppm_m146	Nd_ppm_m146_Int2SE	Sm_ppm_m147	Sm_ppm_m147_Int2SE	Eu_ppm_m153	Eu_ppm_m153_Int2SE	Gd_ppm_m157	Gd_ppm_m157_Int2SE	Tb_ppm_m159	Tb_ppm_m159_Int2SE	Dy_ppm_m163	Dy_ppm_m163_Int2SE	Ho_ppm_m165	Ho_ppm_m165_Int2SE	Er_ppm_m166	Er_ppm_m166_Int2SE	Tm_ppm_m169	Tm_ppm_m169_Int2SE	Yb_ppm_m172	Yb_ppm_m172_Int2SE	Lu_ppm_m175	Lu_ppm_m175_Int2SE	Hg202_CPS	Hg202_CPS_Int2SE	Pb_ppm_m204	Pb_ppm_m204_Int2SE	Pb_ppm_m206	Pb_ppm_m206_Int2SE
SG16a_1	SG16	8830	700	131	79	98	16	36.2	8.4	1382	87	458	32	23.7	2.7	355	20	572	30	83.9	4.7	345	25	66.4	5	17.9	1.2	74.2	5.3	10.23	0.71	66.1	4.1	12.08	0.78	33.2	2.1	4.25	0.33	24.2	1.6	3.02	0.19	258	53	90	11	107.6	9
SG16a_2	SG16	8400	2100	370	420	93	52	13	12	1570	310	660	110	20	3.4	500	130	687	97	119	17	470	100	79	13	23.5	5.2	104	25	13.8	2.8	98	24	15.1	1.7	47.8	6.7	5.16	0.7	34	11	4.23	0.94	220	120	-9.3e-05	1.9e-05	23.3	5.1
SG16a_3	SG16	9090	650	250	130	72	21	124	15	1860	130	599	47	47.6	6.9	130	11	451	31	49.4	4	294	23	143	12	31.3	2.3	156	12	18.4	1.4	109	7.3	17.9	1.5	45.3	3.4	5.69	0.48	29.7	2.2	3.92	0.3	114	40	2.7	1.9	13.8	1.1
SG16a_4	SG16	8490	850	270	120	64	17	27	9.2	1720	140	632	66	22.3	2.7	497	39	779	65	120	11	476	50	91	8.9	21.5	1.9	94.9	8.1	12.9	1.2	89.9	7.7	16.7	1.4	48.1	5	6.09	0.56	34.8	3.6	4.29	0.35	250	53	5.3	2.3	27.5	2.3
SG16a_5	SG16	8520	960	200	150	99	25	36.7	8.2	1770	150	727	62	36.5	6	573	59	935	94	141	12	544	46	101.2	7.6	26.1	2.6	109	10	15.9	1.6	104.1	9.6	20.2	1.9	55.5	5.6	7.1	0.62	38.5	3.5	4.82	0.41	310	110	6.6	3.2	29	2.8
SG16a_6	SG16	7600	1100	260	240	87	27	137	27	3010	370	1350	170	118	15	1460	200	4070	550	743	90	3270	420	722	88	141	21	500	60	61.3	9.6	318	42	47.4	6.3	104	13	11.9	1.6	55.5	6.2	6.65	0.75	370	140	12.3	4.3	35.4	4.1
SG16a_7	SG16	7900	1200	28	61	55	23	37	11	1950	250	2080	290	21.3	4.3	1420	180	1870	210	367	48	1510	160	324	37	86	11	363	40	48.6	6.3	311	31	60.2	7.1	152	18	18	2.6	88	10	10.6	1.3	350	110	59	14	89	16
SG16a_8	SG16	7000	1000	510	350	55	26	28	16	1630	190	576	44	20.2	5.2	496	68	770	120	110	13	444	77	80	13	22.5	3.1	90	14	12.9	2.1	87	12	16.7	2.1	45.2	7.5	5.53	0.81	31.5	5.7	3.94	0.52	250	120	1.3	2.5	24.4	3.8
SG16a_9	SG16	6920	980	1800	760	55	29	324	99	1930	290	571	70	35.8	5.9	135	21	379	56	43.2	5.9	267	44	120	14	25.9	2.9	133	19	15.8	2.3	86	12	13.8	1.8	35.6	4.5	4.43	0.65	23.8	4.1	3.42	0.51	82	45	18	10	21.7	3
SG16a_10	SG16	9080	890	280	140	74	23	106	19	1960	170	574	46	33.5	4.2	119	10	405	37	44.4	3.2	271	23	134	13	31	3	140	11	17.7	1.7	97.8	8.1	16.2	1.5	41.9	3.8	5.45	0.54	29.6	3	3.78	0.35	133	40	21.9	8.5	26.9	6.5
SG16a_11	SG16	8400	1600	310	230	30	26	103	22	1910	380	570	100	26.4	6.1	120	20	378	66	43	5.8	261	47	120	25	24.2	2.4	127	19	15.9	2.3	92	17	16.2	2.4	43.3	7.4	5.22	0.88	27.1	3.7	3.47	0.5	54	56	2.7	2.8	14.5	2.1
SG16a_12	SG16	8820	860	130	120	61	20	108	23	1680	170	597	70	50.7	6.1	139	13	394	41	44.8	4.2	269	25	133	17	28.3	2.2	135	15	16.8	1.8	98	12	16.6	1.6	42.3	4.9	5.11	0.5	29	3.5	3.66	0.42	146	65	12.7	7.7	17.8	2.8
SG16a_13	SG16	7820	750	132	92	256	32	122	20	3640	260	1960	160	106.2	8.6	1800	160	3830	350	595	59	2570	230	552	55	120	12	474	44	58.9	5.7	343	31	58.3	5.4	145	13	17.1	1.4	93.3	7.5	12.6	1	107	60	55	16	71	15
SG16a_14	SG16	6230	770	280	230	80	23	15	13	1450	200	531	68	16.5	2.8	416	53	654	63	103	12	413	62	79	12	18.1	2.4	76.2	9.4	11.8	1.6	72	11	13.4	1.9	36.6	4.6	4.85	0.76	26.8	4	3.64	0.64	240	110	2.4	3.5	24	2.4
SG16a_15	SG16	8600	1100	370	140	58	13	21.8	8.4	1810	180	705	60	21.6	3.3	548	49	1170	130	171	17	665	60	139	11	35	3.4	132	10	17.8	1.5	117.6	9.7	19.6	1.4	52	4.2	6.9	0.59	35.3	3	4.09	0.44	257	67	2.4	1.7	13.5	1.3
SG16a_16	SG16	7100	1000	480	390	349	87	22	14	1710	310	760	160	26.8	5.8	660	100	950	160	150	32	477	58	99	22	23.7	4.8	119	24	14.7	3.2	109	18	21.8	4.6	55	11	7.3	1.3	43.8	8.4	4.97	0.83	310	180	9	6.9	15.8	2.4
SG16a_17	SG16	6800	1400	920	590	46	32	36	40	1940	380	550	110	19.4	5.6	458	96	590	120	76	14	285	61	59	13	15.6	3.9	60	12	8.6	1.8	67	14	13.4	2.8	34.1	6.7	4.6	1	26.9	5.2	3.65	0.79	123	53	13.7	9.5	23.9	6.2
SG16a_18	SG16	7610	940	90	130	188	39	29	15	1720	220	973	92	48	12	840	120	1460	210	201	30	890	130	166	19	40.1	4.4	157	20	22.3	2.5	147	19	27.5	4.3	67.9	8.8	8.8	1.2	46.1	6.9	6.56	0.87	215	71	6	5.6	17.3	2.2
SG16a_19	SG16	8210	770	190	110	89	21	30	8.9	1770	180	720	67	27.6	3.3	550	46	929	80	131	12	533	50	109	11	25.5	2.3	110	11	15.3	1.3	101.3	8.4	18.6	1.6	53.8	4.9	6.75	0.71	36.3	3.1	4.68	0.44	230	70	7.8	2.5	27.6	2.8
SG16a_20	SG16	7650	710	220	120	179	41	112	18	2640	230	2360	200	74.2	6.9	1590	120	2820	220	455	37	1930	160	436	33	108.9	9	458	36	61	4.5	380	23	68.9	5.1	177	13	20.3	1.6	109.3	8.6	13.04	0.96	460	120	126	20	131	15
SG16a_21	SG16	8360	610	170	96	204	23	54.5	8.5	1580	110	1165	85	55.4	5.4	1194	85	2050	140	297	22	1158	79	220	15	49.7	3.4	206	14	28	2	176	11	32.9	2.2	86.4	5.6	10.87	0.77	62.3	4.1	7.9	0.51	130	45	42.1	7.1	51.7	3.8
SG16a_22	SG16	9410	720	260	130	36	12	92	15	1700	130	503	38	28.2	4.2	124.4	9	333	25	36.4	2.4	200	15	93.1	6.7	22.4	1.8	109.8	7.2	13.52	0.88	77.1	5.2	12.51	0.95	33.1	2.4	4.14	0.36	22.4	1.8	3.01	0.22	44	28	17.1	7	31.6	8.2
SG16a_23	SG16	6230	560	140	150	64	28	38	13	1860	250	2240	200	29.3	4.8	1690	160	2570	250	459	32	1990	160	405	26	108.8	9	464	42	59.4	4.7	362	36	60.6	6	149	13	16.6	1.5	85.7	9.3	9.69	0.83	320	100	71	22	65	12
SG16a_24	SG16	9120	700	240	120	39	12	91	14	1660	120	485	37	32.8	4.7	108.3	7.1	349	25	40.9	3.4	239	19	122	10	26.8	2.2	131	10	15.7	1.1	90.9	7.2	14.9	1.2	37.4	3.1	4.61	0.4	24	2	3.1	0.25	75	29	7.7	2.8	16	1.1
SG16a_25	SG16	8100	1000	94	90	96	23	105	16	2480	280	2240	260	68	8.8	1610	180	2810	210	461	41	2030	220	442	48	107	10	441	39	61.3	6.1	362	37	65.6	6.8	168	20	20.2	2.3	107	11	12.4	1.4	290	89	186	25	197	25
SG16a_26	SG16	8900	1100	320	180	63	26	26	12	1730	150	583	59	290	190	496	55	659	60	87.1	8.6	351	39	66.3	8.2	17.2	1.5	70.8	7.1	10.7	1.2	67.5	6.2	15.5	1.6	40.7	3.5	5.6	0.47	32.2	4	4.18	0.42	175	81	4.6	3.7	17.3	1.8
SG16a_27	SG16	8900	1100	140	100	25	10	119	22	1710	200	556	66	15.6	3.3	123	15	371	44	39.9	4.5	228	33	101	14	23.9	3.2	115	16	14.8	2.1	88	11	15.3	1.9	39.6	5.2	4.73	0.52	25.6	2.8	3.65	0.41	143	48	5.5	3.7	15.7	1.8
SG16a_28	SG16	6400	630	480	230	100	28	20	11	1640	110	671	65	25.6	5.1	536	45	875	88	123	11	460	37	104.6	7.2	24.4	2.7	103	11	14.1	1.4	94.9	8.1	17.3	1.8	47.7	4.1	7.02	0.82	35.4	4.4	4.71	0.64	220	100	-0.000124	1.6e-05	21.6	2.2
SG16a_29	SG16	8320	560	126	70	138	22	112	13	2270	170	1810	150	80.4	7.2	1243	87	2260	170	361	27	1600	130	358	30	88.1	7.8	355	29	47.9	3.5	305	24	53.4	4.1	138	11	16.2	1.2	82.1	6.2	10.03	0.8	212	59	298	27	312	25
SG16a_30	SG16	8600	1500	150	200	79	35	25	15	1500	140	820	140	48	22	760	120	1170	110	171	21	711	86	135	23	34.1	6.1	149	25	20.5	3.4	121	20	22.1	2.2	59.4	5.2	7.88	0.85	39.2	5.7	5.56	0.78	470	170	16	5.7	23	3.7
SG16a_31	SG16	6900	1900	430	420	79	61	21	18	1490	200	710	140	24	10	598	92	970	180	142	26	542	77	119	20	25.4	3.9	113	24	15.1	2.7	96	11	17.8	3.6	45.1	6.2	6.2	1.5	33.6	5.1	4.29	0.78	300	230	7	11	12.6	2.4
SG16a_32	SG16	6090	750	340	240	88	17	60	14	1890	160	2140	210	22.1	7.1	1550	160	2110	190	388	36	1810	210	368	42	96.9	8.2	390	37	55.3	6.9	320	36	59.4	3.5	142	16	15.7	1.5	77.9	9.2	9.26	0.96	233	96	17.3	8	24.8	3.4
SG16a_33	SG16	9300	1000	180	100	66	16	13.9	7.2	1570	150	701	60	21.7	3.3	604	54	1052	93	139	12	594	53	113.4	9.9	27.7	2.1	117	12	16.1	1.5	108	10	19.9	1.6	52.3	5.3	6.62	0.66	37.9	3.3	4.8	0.41	160	52	35	10	55	10
SG16a_34	SG16	9430	700	330	120	96	32	139	25	1700	120	543	40	31.7	4.7	130.2	9.7	384	25	43.3	3.2	271	22	123	11	26.9	1.8	130.2	8.6	16.5	1.2	98.6	7.8	15.6	1	39.9	3	5.3	0.42	27	2.2	3.59	0.28	68	28	5.4	2.2	13.74	0.97
SG16a_35	SG16	8290	950	460	270	348	74	136	20	24000	2200	1100	100	201	21	1130	87	1900	150	278	29	1140	120	270	30	59.3	5.6	263	27	33.5	3.5	198	20	35.1	3.4	92.9	9	11.7	1	63.6	5.9	8.62	0.79	200	77	95	25	123	24
SG16a_36	SG16	8200	860	180	110	100	24	28.9	8.4	1600	160	883	78	35.8	4.8	796	94	1370	150	196	19	793	89	155	17	37.8	3.4	149	14	20.8	1.9	130	11	24.9	2.8	63.5	6	8.95	0.95	47.3	5.6	5.72	0.61	171	63	2.4	1.9	15.5	1.4
SG16a_37	SG16	8970	580	166	77	88	17	30	7	1734	96	1014	66	34.6	3.6	804	53	1226	85	159	10	644	47	122.6	9.2	30.7	2.1	131.7	8.4	19.8	1.4	136.9	9.1	26.2	1.8	72.1	4.8	9.43	0.63	51.6	3.6	6.72	0.44	275	68	7.3	2.4	12.85	0.74
SG16a_38	SG16	7530	950	490	350	223	66	181	28	1550	180	482	70	28	6.1	99	14	310	32	49	11	271	42	127	19	26.2	3.8	122	13	14.3	2.1	91	11	15.6	2.1	37.9	6.1	5.09	0.42	25.2	4	3.44	0.59	57	74	-0.000102	1.3e-05	10.2	1.7
SG16a_39	SG16	9110	990	230	140	48	15	197	23	3290	320	2720	310	106	11	2520	250	6980	730	1190	120	5310	540	1240	130	243	23	940	110	111	11	603	67	92.3	9.8	215	22	25.8	3	135	15	16.8	1.8	110	58	23.1	8.2	25.3	3
SG16a_40	SG16	8510	650	190	250	92	30	36	20	1670	250	720	110	28	4.3	574	75	845	98	118	17	550	96	106	17	25.9	1.7	102	15	16.1	2.2	94	11	18.4	2.8	48	6.8	7.1	1.1	35.9	6.3	4.74	0.75	370	160	8.5	8.8	23.4	3.2
SG16a_41	SG16	8560	690	131	73	175	29	134	16	2560	190	2200	160	73.7	6.9	1460	100	2550	180	417	32	1820	140	419	31	100.7	7.4	427	31	59.5	4.2	364	23	67.1	5.2	170	13	19.9	1.3	107.6	7.4	13.05	0.93	396	77	279	29	280	25
SG16a_42	SG16	10600	1100	270	130	263	44	187	24	2060	180	1140	100	24.5	4.2	269	30	789	78	83	9	445	46	177	18	40.9	3.4	209	19	27.5	2.5	175	17	31.3	3.1	88.8	8	11.2	1	62.5	5.6	8.62	0.77	90	39	87	16	103	12
SG16a_43	SG16	9670	820	270	130	44	12	89	14	1670	130	598	50	33.7	4.1	130	11	406	34	46.9	4.4	278	24	122.4	9.8	27.9	2.3	138	13	17.9	1.6	104.4	9.8	17.4	1.4	45.7	4.1	5.69	0.43	30.7	2.9	3.95	0.33	106	42	7.6	2.8	15.5	1.5
SG16a_44	SG16	8190	940	260	160	14.3	7.9	66	16	1580	130	507	51	30.7	4.6	109	11	337	32	38.8	4.3	233	23	103.5	9.3	25.3	2.5	120	12	15.9	1.7	86.4	8.4	15	1.5	37.1	3.5	4.77	0.48	25.7	3	3.24	0.31	82	34	4.9	3	13.2	1
SG16a_45	SG16	9340	700	177	82	52	13	24.4	6.7	2000	140	786	50	18	1.6	538	37	1079	62	159	10	689	48	149	12	37.8	2.8	147.3	9.6	20.2	1.4	130.6	9.8	21.5	1.6	58.7	4	7.42	0.56	36.5	2.5	4.53	0.34	200	49	21.8	4.5	27.5	2.8
SG16a_46	SG16	7780	800	220	140	88	21	109	18	2200	210	1850	190	78	13	1340	120	2290	220	359	35	1550	150	362	34	83.8	7.8	352	33	47	4.4	291	27	52.6	4.9	135	11	15	1.6	82.4	7.2	9.9	0.92	296	83	213	32	240	27
SG16a_47	SG16	6900	2100	80	160	109	48	29	11	1600	350	700	160	17.3	6.1	500	110	1260	300	188	41	790	230	140	28	34.9	8.3	140	37	17.8	3.9	120	27	19.9	4.7	46.6	8.5	5.8	1.4	32.6	8.3	4	0.99	200	110	7.2	6	14	3.6
SG16a_48	SG16	8180	940	180	240	291	92	122	39	2710	310	1120	140	141	17	1020	150	2230	360	346	52	1550	280	323	55	71	14	282	46	32.2	4.4	190	29	33.6	5.2	92	13	10	1.4	57.1	8.6	7.08	0.88	109	63	92	34	82	26
SG16a_49	SG16	6940	840	250	130	730	130	74	34	2450	280	220	31	75	11	157	21	288	37	39.4	5.5	154	24	39.7	6.3	9.2	1.3	39.9	5.8	5.7	0.6	38.8	5.7	6.66	0.86	19.4	2.3	2.45	0.4	14.8	3	2.27	0.29	160	80	25.5	9	35.4	3.6
SG16a_50	SG16	6800	1400	230	190	28	24	136	43	3230	580	2010	360	47	11	1990	360	3160	630	488	86	2110	360	451	77	104	16	422	75	49	8.9	292	49	47.9	7.9	108	18	14.5	2.5	71	12	9.5	1.9	230	120	43	12	64	15
SG16a_51	SG16	8610	970	330	210	119	44	79	20	2050	230	1120	120	45.9	9.8	890	100	1430	140	184	25	764	71	154	18	38.7	5.1	167	20	23.2	2.4	165	16	28.5	1.9	83	13	10.6	1	58	6.4	7.14	0.69	180	140	10.4	6.2	15.9	3.1
SG16a_52	SG16	7000	2400	110	230	61	52	65	36	1680	180	950	110	51	16	1030	150	2050	350	276	51	1100	270	224	27	48.7	8.1	190	42	25.7	5.3	161	34	27.8	6	75	15	9.8	2.5	58	12	6.8	1.3	120	160	34	18	43.5	8.8
SG16a_53	SG16	10200	1100	320	150	92	18	24.8	9.5	1820	180	872	85	35.4	4.8	789	85	1230	130	177	16	735	77	146	15	33.7	3.6	140	15	19.4	2.1	123	12	22.9	2.4	62.3	7.1	8.19	0.93	42.5	3.8	5.75	0.55	223	58	2.3	1.6	15.9	1.5
SG16a_57	SG16	8570	750	580	400	100	34	105	26	2470	200	2280	180	55.5	7.5	1620	130	2790	220	463	38	2110	150	471	36	117	10	457	34	61.2	4.6	367	33	65.8	4.3	170	14	19.7	1.6	102.1	8.4	12.31	0.99	300	110	180	24	192	21
SG16a_58	SG16	9270	750	38	43	85	16	26.9	7.9	1660	110	645	44	24	3.2	535	40	865	59	126	8.5	511	38	99.2	6.9	23.1	1.8	102.2	7	14.69	0.98	93.4	6	18.1	1.3	48.9	3.6	6.12	0.47	36	2.9	4.45	0.33	275	58	7.2	2.7	28.5	1.9
SG16a_59	SG16	7170	780	260	140	487	84	64	15	3030	260	421	46	97	11	514	55	661	71	94	10	389	53	70.4	8.3	15	1.7	69.2	7.9	9.4	1.2	59.9	7.3	10.7	1.3	29.8	3.9	4.16	0.5	21.4	2.8	3.2	0.33	139	51	14.2	5.9	20.9	2.2
SG16a_60	SG16	7840	510	201	80	81	16	163	18	2250	170	1076	84	47.6	4.1	726	60	2070	170	352	31	1610	150	404	34	86.7	6	334	29	40.8	3.4	220	19	33.4	2.8	79.8	6.6	8.89	0.77	45.7	3.1	6.11	0.5	166	55	17.6	4	24.6	1.6
SG16a_61	SG16	5000	1100	1360	870	450	170	310	110	1900	440	750	230	25	10	500	120	790	170	105	25	460	120	79	18	24.8	6.4	88	22	14	3.8	84	19	20.7	5.5	58	16	7.4	2.2	37.9	8.5	6.7	1.9	460	140	1710	490	1770	400
SG16a_62	SG16	8400	540	182	83	98	18	100	13	2380	160	2060	140	80.7	5.9	1480	100	2540	190	402	28	1800	130	423	31	97.3	6.5	428	31	56.4	3.9	345	22	61.3	4.1	159	11	18.9	1.3	99.3	6.4	12.26	0.88	292	55	194	21	206	21
SG16a_63	SG16	8280	950	250	150	49	18	34.2	9.2	1840	170	2270	220	22.8	3.9	1590	150	2220	210	424	41	1840	200	394	47	90	8.5	402	35	54.9	4.9	351	35	61.7	5.3	158	15	17.5	2	95	10	10.7	1.2	318	96	46	13	58	11
SG16a_64	SG16	9100	1800	650	700	28	36	129	59	2420	620	680	170	36	11	150	41	500	130	56	15	347	92	155	32	37	10	168	43	20.7	4.9	128	37	20	5.5	53	15	6.4	1.7	36	12	4.27	0.97	36	49	13	11	17.6	4.1
SG16a_65	SG16	7400	1100	750	530	87	28	21	17	1710	200	697	97	23.2	5.1	589	76	910	110	125	17	494	68	91	10	22.4	3.1	101	14	14.2	1.8	91	12	18.1	2.7	50.4	7.7	6.34	0.85	33.9	5	4.36	0.53	217	71	2.1	2	10.6	1.4
SG16a_66	SG16	8690	700	156	80	0	1	49.4	8.8	4990	360	859	70	25.4	3	508	40	1153	85	206	18	929	74	245	18	53.3	4.3	220	16	28.5	2	154	12	24.5	2	56.1	4.6	5.94	0.46	29.4	2.2	3.43	0.25	175	42	146	29	139	22
SG16a_67	SG16	7840	900	140	84	187	49	29.1	8.9	1480	110	782	83	20.4	3.6	722	72	1080	110	136	13	545	56	96.4	9	25.2	2.4	112	13	15.5	1.5	102.4	6.7	21.4	1.9	59.4	4.2	7.7	0.75	42.1	3.4	5.2	0.53	250	120	5.6	2.4	12.9	1.2
SG16a_68	SG16	9400	1400	330	220	117	28	31	16	1820	230	1180	170	43.1	8.5	960	130	1560	210	230	30	880	110	186	26	44	6	187	24	26.5	4.5	163	23	30.9	4.7	79	12	10.4	1.6	56.5	6.7	7.6	1.3	100	62	12	4.7	18.3	2.5
SG16a_69	SG16	10600	1000	360	180	129	33	292	59	1960	200	696	71	55	11	157	16	513	50	58.3	5.9	328	32	160	19	33.3	3.5	168	16	21.7	2.1	131	13	20.4	1.9	54.9	6.1	6.47	0.69	37.8	3.6	4.97	0.52	117	41	29.9	8.9	42.6	4.1
SG16a_70	SG16	11200	3100	810	740	0	1	150	140	2100	500	630	180	53	29	150	53	440	140	45.9	8.4	277	56	149	23	34.1	6.4	156	31	20	4.5	107	36	18.1	4.9	40.1	9.3	5.6	1.3	30.6	7.4	3.18	0.66	150	100	8.7	6.1	16.9	4
SG16a_71	SG16	8270	720	150	110	83	25	30.6	7.6	1565	83	1005	65	41.4	8.6	845	49	1576	68	219	15	880	49	179	11	40	2.5	167	11	23.5	1.4	148.8	9.5	26.2	1.7	72.3	4.8	9.42	0.65	52.8	3.5	6.54	0.45	211	82	2.6	2	12.96	0.67
SG16a_72	SG16	9300	1300	120	160	67	31	39	11	1770	240	890	140	17.9	3.9	800	140	1900	280	256	39	1110	190	229	25	55.6	7.8	196	31	26.2	4.5	154	24	27.5	3.9	66	11	7.6	1	40	6.6	4.8	0.84	180	140	8.4	4.5	22.4	3.6
SG16a_73	SG16	9220	730	135	99	85	21	113	19	2710	210	2650	210	47.4	5.5	2020	150	3240	270	585	50	2530	190	578	46	128	10	575	47	76.7	6.5	444	36	74.8	5.9	180	14	19.9	1.6	95.9	7.4	11.26	0.91	231	76	6.3	2.7	11.61	0.97
SG16a_74	SG16	8650	900	410	180	39	15	199	28	1930	140	825	69	51	7.1	180	14	622	51	68.2	6	402	29	180	16	40.2	3	201	16	25.8	1.9	153	11	25.9	2.1	65.7	4.8	7.86	0.74	40.4	2.9	4.96	0.36	166	49	10.5	3.5	15.3	1.1
SG16a_75	SG16	8200	1500	140	170	174	59	119	33	2960	390	569	68	81.4	9.6	750	100	1000	130	140	18	557	81	108	24	23.4	4.7	104	13	14.6	2.1	80	11	16.3	2.5	40.8	5	5.69	0.79	29.4	3.1	3.99	0.51	520	240	1000	220	1010	240
SG16a_76	SG16	11300	1000	180	100	111	24	156	20	2130	160	1143	90	50	15	281	21	790	65	78.8	7.3	438	34	184	16	41.7	3.6	206	16	28.2	2.2	172	14	32.6	2.6	91.7	7.3	12.3	1.1	71	5.6	9.16	0.78	48	25	87	15	89.6	6.9
SG16a_77	SG16	8900	1400	19	50	60	31	319	59	1800	240	553	76	31.1	6.6	120	18	420	70	47.1	7.4	273	39	129	20	27.7	4	131	17	17.4	2.9	92	13	16.1	2.2	40.6	6.8	4.66	0.59	28.2	4.5	3.76	0.43	100	68	7.2	5.6	19.6	3.1
SG16a_78	SG16	9710	810	108	63	236	28	61	11	1920	150	937	82	38.4	4	776	60	1131	86	142	12	577	47	109.6	9.8	26.2	2	120	10	17.3	1.3	116.7	8.4	24	1.8	66.5	5.2	8.58	0.63	48.3	3.7	6.28	0.52	216	56	5.2	1.9	12.2	1.1
SG16a_79	SG16	7890	910	123	84	69	18	326	42	1810	150	460	41	30.1	3.6	328	27	709	68	122	12	557	57	125	11	28.1	2.5	118	11	14.8	1.4	80.9	7	13.4	1.3	29.6	3.1	3.26	0.29	15.8	1.5	1.84	0.18	166	51	13.9	3.8	23	2.4
SG16a_80	SG16	9390	620	173	76	100	18	15.2	5.5	1655	91	608	35	21.7	2.5	504	30	798	43	114.4	6.3	457	25	91.7	5	21.7	1.3	91.8	4.9	13.48	0.83	86.6	4.6	16.79	0.9	43.8	2	5.99	0.29	33.2	2.1	4.25	0.28	241	59	6.1	2	31.2	2
SG16a_81	SG16	6500	1000	1000	490	247	67	61	28	2670	190	623	79	73.3	9.1	699	58	1049	93	146	11	606	43	110	12	25.3	2.7	106	13	14.2	1.2	84.2	7.3	16	1.4	40.3	2.9	5.82	0.81	29.9	2.7	3.94	0.33	212	93	19.6	8.7	18	2.2
SG16a_82	SG16	8560	640	161	80	747	51	89	13	3390	200	477	33	123	7.1	665	42	986	74	141	11	566	43	92.6	7.2	20.4	1.5	87.4	5.8	11.71	0.8	73	4.9	13.52	0.88	36.4	2.3	5.12	0.35	30.3	2	3.78	0.21	155	42	29	5.1	45.1	3.6
SG16a_83	SG16	11000	1100	170	110	126	28	2590	470	1900	170	461	41	15	3	105	10	281	25	35.4	3.8	213	19	110	11	24.3	2	113.3	9.3	14	1.3	71.4	5.8	12.3	1.1	28.9	2.5	3.44	0.34	20.3	2.1	2.43	0.19	51	26	7.7	3.1	14.4	1.4
SG16a_84	SG16	9020	620	152	74	815	69	70	11	3260	190	365	26	120.8	8.8	574	34	768	45	101.4	7	407	30	57.5	4.9	12.18	0.91	57.3	4.3	7.66	0.55	49.2	3.4	9.48	0.63	27.5	1.9	3.72	0.24	23.2	1.3	3.13	0.17	65	28	461	60	480	58
SG16a_85	SG16	9100	1600	120	170	136	59	124	45	2580	470	2670	490	64	15	1890	320	3040	570	482	76	2500	250	516	87	117	22	489	56	70	14	430	100	79	16	195	37	22.9	4.9	114	17	14.3	2.7	340	260	40	15	70	22
SG16a_86	SG16	7830	860	110	110	86	26	11	14	1530	180	592	84	41	17	473	38	718	65	108	12	555	98	97	17	20.8	3.4	83.7	9.8	12.2	1.2	79.1	8	15.22	0.87	46.9	7.6	4.95	0.72	30.5	4.1	3.92	0.29	280	110	5.3	4	24.6	2.6
SG16a_87	SG16	8630	640	157	76	66	14	153	15	2480	170	1290	98	109.6	9.7	1235	90	2740	190	428	30	1960	160	428	33	87.1	5.9	364	29	44.2	3.1	241	18	38.2	2.7	89.8	6.1	10.51	0.78	56.5	4	7.18	0.44	339	66	580	71	600	75
SG16a_88	SG16	9630	800	131	74	99	17	38.5	9.4	1530	100	1047	74	33.9	3.6	804	59	1304	97	166	12	713	59	137	10	34.3	2.5	152	12	21.1	1.6	145	10	28.4	2.1	78	6.4	9.61	0.8	56.1	4.1	6.85	0.49	279	66	2.4	1.6	12.82	0.92
SG16a_89	SG16	9230	960	29	45	76	18	29	11	1730	140	656	58	32.2	5.7	520	41	834	61	122	10	483	34	98.7	7.8	22.8	1.6	96.7	7	13.9	0.96	93.4	6.4	17.8	1.1	49.4	3.4	6.23	0.52	35.8	2.8	4.5	0.33	200	76	2.7	1.8	22.6	1.5
SG16a_90	SG16	10900	1800	190	160	126	35	59	22	2430	330	3100	440	79	12	2000	290	4000	600	581	85	2790	450	613	92	157	25	644	96	88	13	550	86	97	15	224	34	27.3	4	136	19	17.6	2.6	440	120	41	9	58	11
SG16a_91	SG16	9000	2600	1010	600	0	1	158	60	1400	370	473	82	101	46	65	15	286	80	38	11	306	80	208	58	37.4	8.7	198	51	21.8	5.2	105	26	15	3.9	37	9	4.6	1.4	24.8	6.7	3.4	1.4	230	160	8	10	11.1	2.8
SG16a_92	SG16	7740	840	360	160	76	24	39	19	1740	170	673	63	22.9	3.4	536	50	842	78	119	11	491	49	102	13	24.5	2.2	97.7	9	14.1	1.2	93.6	9.3	17.7	1.6	48.1	4.4	6.42	0.55	35	3	4.39	0.4	166	48	4.5	2.4	25.9	2.7
SG16a_93	SG16	6300	1700	1800	1200	72	78	36	52	1810	500	640	210	19.9	9.5	500	130	750	200	108	31	490	110	81	21	19.9	5.5	90	25	14.1	3.7	82	19	17.5	4.5	42	11	6.4	1.9	36	10	4.3	1.4	154	80	3.3	6.6	25.6	7.4
SG16a_94	SG16	10450	940	190	150	106	28	47	15	1520	120	465	49	23.3	3.3	363	30	618	57	85.6	8.7	375	41	69.8	9.5	17.2	2.1	76.5	6.1	10.38	0.96	69.7	5.9	12.29	0.84	34.4	3	4.82	0.52	25.2	3	3.24	0.34	540	190	261	64	262	31
SG16a_95	SG16	9000	1000	540	250	121	29	327	91	1700	160	517	55	24.1	4.5	127	13	336	36	34.6	3.6	215	26	96	11	21.5	1.9	103	11	12.4	1.3	71.1	7.5	12.8	1.5	34	3.8	4.26	0.41	25	3.2	3.23	0.34	194	51	4.7	3	15.2	1.7
SG16a_96	SG16	8100	1000	540	250	21	10	21	12	1640	200	370	44	10.8	2.1	299	31	398	42	57	6.8	225	26	41.5	5.1	11.3	1.5	47.9	4.9	6.48	0.68	44.8	4.9	9.13	0.98	26	2.9	3.53	0.46	21	2.5	2.63	0.31	92	36	7.8	3.9	16.5	1.9
XNC22a_1	NC22	-19100	2100	-140	200	92	22	89	15	2920	260	46.1	5.9	59.1	6.8	45.7	5.8	136	18	12.8	2	49.4	5	10.4	2.3	2.92	0.46	9.7	1.3	1.68	0.28	8.9	1.3	1.6	0.24	3.76	0.54	0.44	0.055	2.21	0.36	0.325	0.061	400	120	63	10	81.7	9
XNC22a_2	NC23	-19400	1600	-70	110	302	35	81	14	2030	130	249	19	61.1	5	287	17	719	50	66.5	5.1	257	20	50.1	3.5	12.02	0.96	50.1	3.7	6.92	0.46	42.1	2.7	7.47	0.51	17.9	1.1	1.94	0.15	9.5	1	1.34	0.12	730	120	17.5	4.5	28.7	1.8
XNC22a_3	NC24	-17900	1400	-100	170	31	12	519	67	4290	460	149	91	6.9	2.5	146	89	500	300	37	22	160	100	33	19	7.6	4.5	32	19	4	2.4	23	13	4	2.4	11.4	6.8	1.24	0.72	7.5	4.7	1.12	0.66	313	84	58	24	57	23
XNC22a_4	NC25	-17200	2100	-30	160	248	38	87	18	1960	180	295	29	57.9	6.5	365	38	984	83	97	13	350	37	62.9	6.2	16.4	1.8	66.5	7.5	9.23	0.95	52.8	5.6	9.5	0.96	22.2	2.1	2.25	0.28	10.17	0.98	1.42	0.18	700	130	14.7	4	26.5	2.7
XNC22a_5	NC26	-15000	1500	-100	150	276	47	77	14	1990	200	165	25	38.1	4.8	206	31	539	77	51.6	8.2	184	23	35	6	9.5	1.2	34.3	5	4.96	0.67	29.1	4	5.48	0.65	12.4	1.4	1.34	0.17	6.16	0.73	0.82	0.1	1620	220	16.4	4.7	26.2	2.3
XNC22a_6	NC27	-18900	2100	-60	150	263	40	54	14	2140	190	283	22	61.6	7.9	340	30	876	86	75	6.2	315	28	57.2	5.8	14.3	1.1	56.4	4.8	8.26	0.74	45.4	4	8.57	0.88	20.2	2.1	1.96	0.19	9.7	1.1	1.32	0.14	660	150	13.9	4	30.2	2.8
XNC22a_7	NC28	-15600	2300	100	120	270	41	84	16	1960	200	223	20	51.2	6	289	21	708	61	66.6	7.7	253	25	53.4	5.7	13.2	1.3	50.3	4.9	6.82	0.72	36.5	4.3	7.48	0.86	16.4	1.6	1.75	0.22	7.7	1	1.06	0.09	2990	350	14.7	5.5	24.5	2.2
XNC22a_8	NC29	-18700	1200	-60	120	289	36	69	12	2080	130	220	15	41.2	3.7	269	18	723	50	61.5	4.3	238	16	40.3	3.1	12	1	46	3.3	6.42	0.52	36.8	2.6	6.32	0.44	15.2	0.94	1.57	0.18	7.22	0.78	0.962	0.068	1950	230	12.7	2.9	26.1	1.6
XNC22a_9	NC30	-17800	1500	78	88	298	35	59	10	1927	93	62	12	27.5	3.5	80	13	199	34	18.4	3.2	69	11	13.5	2.4	3.4	0.72	12.9	2.7	1.92	0.43	9.9	1.7	2.11	0.43	4.74	0.86	0.52	0.11	2.64	0.56	0.368	0.085	261	86	19.5	5	34.1	2.3
XNC22a_10	NC31	-16600	2100	-30	180	133	21	62	20	2280	270	236	34	110	11	223	30	640	70	62.2	7.5	259	32	50.9	8.2	13.8	1.7	48.7	4.4	7.2	1	41.9	5.3	7.65	0.82	19.8	3.2	2.09	0.26	10.5	1.6	1.3	0.16	520	160	37.4	8.4	62	5.7
XNC22a_11	NC32	-18100	1800	-120	220	307	55	52	12	2160	240	227	27	54.2	9.7	301	34	746	81	64.8	6.5	262	28	45.5	5.7	12.3	1.3	45.7	4.9	6.48	0.74	37.3	4	7.12	0.7	15.6	1.4	1.71	0.2	8.5	1.1	1.06	0.15	440	130	15.8	4.9	30	3.4
XNC22a_12	NC33	-15600	2100	-10	110	319	49	84	16	2130	210	236	22	63.5	6	270	28	691	73	63.5	5.7	245	23	47.6	4.8	12	1.2	48.8	5.9	6.69	0.55	38.6	3.6	6.96	0.48	17.3	1.7	2.32	0.23	11.2	1.4	1.5	0.17	870	190	17.5	4.6	32.1	3.3
XNC22a_13	NC34	-18700	2000	-180	190	306	46	84	19	2130	190	211	19	51	6.6	288	26	687	60	62.3	6	259	26	44.8	4.6	12.2	1	46.3	4.7	6.18	0.52	37.4	3.4	6.68	0.7	16.2	1.7	1.71	0.17	7.64	0.95	1.03	0.12	223	87	14	3.4	29.1	2.5
XNC22a_14	NC35	-16700	1500	-60	130	193	27	84	12	2020	160	309	25	55.6	5.5	389	27	1030	89	96	9.2	328	26	63.3	4.9	19.2	1.6	71.3	5.6	9.55	0.74	54.9	4	10.05	0.79	22.7	1.7	2.32	0.18	10.42	0.97	1.41	0.13	1390	160	10.6	3.2	23.2	1.6
XNC22a_15	NC36	-14400	2400	-110	490	254	61	80	46	2020	240	290	35	59	12	420	68	1050	150	97	13	348	42	70	11	17.3	2.1	65.7	9.9	8.8	1.3	56	7.9	9	1.3	21.8	3	2.25	0.35	11	1.7	1.49	0.26	650	170	20.1	7.1	27.3	3.7
XNC22a_16	NC37	-18000	1400	-130	140	285	33	89	15	2160	170	236	20	47.3	3.9	311	22	803	66	76.8	6.8	292	27	51.4	5	13.3	1.2	53	4.1	7.42	0.6	42.3	3.5	7.76	0.63	16.9	1.3	1.82	0.18	8.68	0.77	1.11	0.11	730	110	16.5	4.7	28.4	2.1
XNC22a_17	NC38	-19800	1600	-20	120	338	35	60	12	2150	130	209	15	49.9	3.8	257	20	680	49	63.6	4.3	246	20	46	4.2	11.8	1	45.8	4.1	6.1	0.49	36.2	2.8	6.89	0.57	15.9	1.3	1.74	0.16	8.03	0.61	1.105	0.092	750	120	15.8	4.3	31.4	2.1
XNC22a_18	NC39	-15000	2400	-180	260	207	33	69	14	2140	290	335	42	51.4	7.8	422	63	1140	160	101	12	388	42	72	10	18	2.2	67.6	8.5	9.7	1.2	59.5	8.1	10	1.2	23.4	3.1	2.36	0.31	10.6	1.6	1.39	0.19	580	140	10.8	3.9	22.8	2.6
XNC22a_19	NC40	-18300	1600	40	100	315	40	76	12	2100	170	255	23	52.8	4.4	324	29	820	70	69.7	4.9	291	24	52.1	4.8	14.1	1.3	50.5	3.5	7.42	0.56	41.8	3.3	7.88	0.63	18.5	1.7	1.92	0.19	9.13	0.91	1.196	0.096	930	140	11.4	3	27.8	2.3
XNC22a_20	NC41	-17400	1700	-20	180	296	42	73	16	2290	240	306	36	63.9	7.8	377	39	990	110	93	10	343	34	62.7	7.1	16.7	1.7	61.2	6.2	8.8	1.1	52.2	5.5	9.29	0.94	21.4	2.8	2.2	0.23	11	1.3	1.41	0.17	860	190	19.9	5	28.6	2.6
XNC22a_21	NC42	-16700	1400	-130	150	233	35	99	13	2030	170	242	15	56.5	4.2	319	23	734	56	67.6	4.6	274	19	47.8	4.2	12.6	1.1	51.6	4.2	6.84	0.51	40.6	3.2	7.61	0.5	18.3	1.1	1.87	0.19	8.5	0.74	1.25	0.11	1450	190	12.6	3.8	25.4	1.7
XNC22a_22	NC43	-18500	1900	-50	150	9.4	6.2	767	83	4100	340	163	26	10.5	1.6	197	34	560	120	42.2	9.6	177	38	33.4	9.1	6.7	1.6	32.1	8.1	4	1	22.6	5.2	4.19	0.79	12	2.3	1.47	0.36	8.4	1.7	1.28	0.27	260	110	154	28	157	19
XNC22a_23	NC44	-15600	1700	-90	160	209	36	93	15	1890	170	279	25	56.9	6.3	344	30	857	62	79.7	5.5	303	30	54.2	5	14.7	1.5	55.7	6	8.03	0.64	48.5	3.3	8.3	0.8	20.1	1.8	2.11	0.21	10.2	1	1.29	0.12	5690	650	11.8	4	23.5	1.4
XNC22a_24	NC45	-13500	2000	-80	210	226	65	91	28	1943	92	250	38	55	11	268	37	780	130	75	12	268	42	48.6	4	12.3	1.9	54	10	6.9	1.1	40.6	6.4	7.8	1.1	16	2.2	1.89	0.36	9.5	2	1.05	0.19	2950	490	21.4	8.4	24	3.1
XNC22a_25	NC46	-17100	2900	-30	190	294	56	52	11	1910	210	175	21	73	30	249	26	600	60	56.5	6.4	217	20	37.2	4	9.2	0.93	37.8	4.3	4.88	0.65	29.9	2.8	5.46	0.44	13.3	1.7	1.59	0.16	7.8	1	1.09	0.2	840	230	15.9	4.8	26.2	2.7
XNC22a_26	NC47	-19200	1900	0	110	306	41	80.3	7.5	1990	140	269	21	55.5	5.1	336	26	908	69	75.5	5.6	301	25	56.1	5.2	14.6	1.2	59	4.8	8.06	0.55	46.9	3.5	8.23	0.62	19.5	1.2	2.05	0.18	9.34	0.9	1.26	0.11	1300	180	12.8	2.7	26.8	1.8
XNC22a_27	NC48	-16800	1800	-30	220	0.69	1.37	520	48	4760	480	2670	310	34.3	3.5	3640	380	15800	1700	1260	140	5330	550	1120	110	227	23	918	83	109	11	554	50	88.4	8.7	218	23	24.6	2.5	125	13	17.8	2.1	520	140	94	16	103	11
XNC22a_28	NC49	-15200	2000	-20	220	317	70	52	14	1830	230	116	23	29.8	5.1	146	18	357	57	33.8	5.7	116	16	22.1	3.4	5.01	0.68	20.5	2.6	2.83	0.46	17.1	2.4	3.27	0.64	7.3	1.3	0.89	0.17	4.8	0.82	0.57	0.12	340	100	33.7	8.1	53.1	8.8
XNC22a_29	NC50	-14500	1300	-140	160	298	32	55	11	1970	160	151	13	35.9	3.8	201	14	500	38	48.3	4	188	15	32.5	2.6	8.8	0.74	33	2.8	4.31	0.39	26.7	1.7	5.01	0.43	11.9	1	1.24	0.12	5.89	0.5	0.726	0.075	453	81	16.1	3.1	27.6	2.1
XNC22a_30	NC51	-17300	1600	-190	160	20	11	869	77	4440	430	1140	130	50.4	6.3	1410	180	3870	600	379	52	1620	240	327	50	72	10	279	37	35.5	4.5	212	26	38.8	4.7	96	12	11.4	1.4	63.4	7.2	9.1	1	540	110	206	58	232	64
XNC22a_31	NC52	-16900	2200	-30	200	273	45	74	15	2070	210	246	21	49.6	5.4	333	36	864	90	77.1	8.5	305	38	54.8	6.9	14.9	1.7	55.3	5.6	7.09	0.77	45	5.1	7.55	0.76	16.1	1.7	1.89	0.23	8.6	1.1	1.06	0.13	870	120	15.7	4.8	28.2	2.6
XNC22a_32	NC53	-16900	2300	-40	200	72	30	225	75	2080	220	497	59	196	18	371	37	837	91	81.9	8.1	307	32	65.9	5.9	17.8	1.7	73	6.4	11.1	1.2	74.5	7.7	13.9	1.2	40.9	4.2	5.36	0.65	33.1	3.3	5.02	0.49	880	140	41	11	44	3.9
XNC22a_33	NC54	-17900	2300	-110	230	262	51	75	20	2010	210	261	32	50.3	6.4	324	44	828	80	75.4	8.3	305	37	53.1	5.3	14.7	1.7	56.4	8.2	7.42	0.92	45.3	6.6	7.56	0.8	18	1.9	2.04	0.3	8.8	1.2	1.12	0.16	880	140	17.3	4.4	26.1	2.5
XNC22a_34	NC55	-16400	2100	-170	210	248	38	55	26	1970	190	238	23	50.6	5.9	292	23	812	95	72.9	9.5	267	31	48.4	5.5	13.2	1.3	51	5.4	7.16	0.73	40.6	3.8	7.64	0.82	17	1.7	1.92	0.23	8.5	1.3	1.09	0.11	423	92	18	10	24.7	2.1
XNC22a_35	NC56	-16200	1200	40	140	305	37	71	16	1870	150	200	16	44.8	4.6	246	19	602	45	54.9	4.4	228	23	39.6	4.5	10.8	1.2	42.5	3.8	5.67	0.52	30.4	2.7	6.14	0.53	14.22	0.96	1.54	0.15	7.43	0.72	0.98	0.12	660	140	19.1	6.2	28.4	2
XNC22a_36	NC57	-17700	1400	100	100	300	45	74	14	2220	190	290	27	54	6	352	33	953	90	83.8	7.3	313	24	60.5	5.1	16.5	1.7	61.9	5	8.32	0.73	49	4.1	8.96	0.9	20.4	1.8	1.97	0.2	9.7	0.98	1.24	0.12	489	91	17.3	3.4	27.6	2.4
XNC22a_37	NC58	-22600	1900	-200	220	0	1	293	32	3070	250	133	18	4.6	1.5	149	23	261	48	20.9	4	97	15	15.7	3.4	3.87	0.71	16.3	3.2	2.46	0.52	13.8	2.6	2.94	0.51	8.2	1.4	1.09	0.14	6.02	0.93	1.1	0.18	226	99	8.9	4	7.5	1.5
XNC22a_38	NC59	-18200	1300	-50	130	19.1	7.4	619	49	4150	250	2390	160	68.2	5.9	3100	180	10230	690	745	47	3140	160	572	37	129.1	8	571	32	67.1	4.1	368	21	69.5	4	172	11	22.3	1.5	120.2	6.7	16.91	0.98	109	46	72.1	8	71.7	4.3
XNC22a_39	NC60	-16500	3300	-130	720	221	60	53	31	1920	280	250	33	51.8	9	360	55	1040	180	91	17	340	62	52.2	8.1	15.6	2.4	62.3	9.3	8.5	1.3	40.6	4.7	8.6	1.4	18.6	2.5	1.97	0.36	7.7	1.4	1.04	0.15	630	130	13	5.9	22.9	3.6
XNC22a_40	NC61	-17500	1300	46	94	123	18	475	42	3330	230	83	12	16.4	2.2	92	14	213	42	17.1	3.4	80	18	16.4	4	3.42	0.75	15.6	3.5	1.87	0.4	11.7	2.7	2.17	0.42	5.85	0.98	0.77	0.15	4.51	0.81	0.65	0.1	211	73	47.8	7.1	58	5.9
XNC22a_41	NC62	-17800	1900	-100	180	203	27	90	17	2220	200	350	31	65.3	7.7	408	41	1028	99	97	11	369	38	66	7.1	18.9	1.9	67.4	5.8	9.65	0.85	58.7	5.7	10.4	1.1	24.6	3	2.48	0.25	11.3	1.1	1.57	0.17	820	110	24.6	5	35.1	3.3
XNC22a_42	NC63	-15800	1400	-190	340	248	32	53	18	2210	190	328	29	55.1	6.1	404	39	1018	98	90.2	8.5	358	34	67.1	6.8	18.7	1.9	71.8	6.8	9.16	0.96	52.8	5.2	9.74	0.88	20.5	2	2.2	0.26	10.2	1	1.3	0.11	377	73	12.9	3.9	26.3	2.1
XNC22a_43	NC64	-16900	2200	-170	220	301	61	83	21	2030	220	283	42	62	11	324	36	841	98	73.3	7	291	39	55.6	6.9	13.8	1.6	54.7	7.5	7.65	0.87	44.4	4.9	8.1	1.1	18.7	1.9	2.13	0.32	10	1.2	1.31	0.2	700	120	18	5.3	28.5	2.9
XNC22a_44	NC65	-17100	1700	-100	140	250	33	64	14	2120	170	253	24	51.7	4.7	303	26	784	64	70.7	6.4	281	28	48.7	4.1	13.5	1.1	52.1	3.7	7.17	0.53	43.8	3.7	7.72	0.61	17.6	1.3	1.9	0.15	9.13	0.91	1.17	0.12	403	86	15.1	3.1	28.1	2.1
XNC22a_45	NC66	-16300	2400	-280	580	122	30	97	32	2560	300	180	20	154	40	177	21	523	80	49.9	7.6	188	21	40.5	6.2	11.1	1.6	40.5	5	5.52	0.64	33.6	4.9	6.36	0.83	15	2.4	1.66	0.28	9.5	2.3	1.22	0.23	407	98	48	13	68	8.4
XNC22a_46	NC67	-12800	1900	-740	630	60	21	44	33	2330	260	67.5	9.5	82	11	73.1	9.6	179	24	16.5	2.3	67.4	9	11.6	2.2	3.44	0.62	12.5	1.7	1.74	0.28	10.5	1.5	1.9	0.26	4.59	0.7	0.6	0.13	3.18	0.51	0.463	0.063	292	80	58	15	61	6.9
XNC22a_47	NC68	-17600	2600	-230	310	139	43	72	21	2030	270	241	39	99	13	219	28	658	98	67.5	9.1	262	39	53.4	6.9	14	2.1	52.5	7.4	7	1.2	42.5	5.7	6.9	1	16.3	2.7	2.1	0.42	8.8	1.5	1.17	0.18	770	220	39	10	49.8	6.4
XNC22a_48	NC69	-16400	1200	-20	110	158	22	64	11	2240	180	152	11	75.5	6.5	139	11	350	27	34.2	3.3	138	12	27.8	3	7.36	0.71	28.7	2.4	4.12	0.35	23.9	1.8	4.64	0.32	11.65	0.79	1.21	0.11	6.79	0.68	1.012	0.091	195	53	48.6	8.3	57.5	5.5
XNC22a_49	NC70	-14500	2300	-370	350	247	42	67	20	2080	390	254	37	62	11	329	43	840	150	86	13	303	50	53.5	8.8	16.2	3	59.4	9.3	8.1	1.1	48.1	7.9	7.5	1.1	18.5	3.3	2.06	0.35	8.6	1.4	1.2	0.22	800	220	10.7	4.9	23.9	3.8
XNC22a_50	NC71	-18500	6400	-240	740	320	150	103	69	2350	600	257	81	50	12	308	96	810	280	80	27	256	69	41	10	12.8	3.5	49	14	6.8	1.7	34.5	7.5	7	1.9	15.6	4	1.76	0.76	7.4	1.6	1.09	0.33	248	92	29.4	9.9	23.9	5.7
XNC22a_51	NC72	-17500	1700	-100	120	5.1	4.2	411	44	3950	320	149	43	19.8	2.9	227	49	340	130	24.5	8.9	109	50	21	11	3.9	2.2	19.9	8.6	2.27	0.97	14.4	6.5	3.1	1.2	10	3.9	1.16	0.38	6.5	2.1	1.19	0.35	270	100	110	19	109	14
XNC22a_52	NC73	-18300	1600	20	100	182	33	127	19	2880	250	566	49	379	39	437	34	1016	74	94.2	8.1	378	31	83.4	7	22.8	1.5	101.7	9	14.6	1.3	94.2	7.6	19.8	1.7	52	4.8	7.73	0.82	50.4	5.8	7.66	0.86	242	92	58	11	86	11
XNC22a_53	NC74	-16000	1300	-40	120	324	41	49	10	1930	140	120	11	35	3.2	146	12	359	27	34.2	2.7	131	13	23.2	2.3	6	0.52	25.4	2.4	3.35	0.26	19.3	1.5	3.59	0.28	8.09	0.69	0.863	0.085	4.23	0.47	0.611	0.066	301	65	16.9	3.7	26.1	1.6
XNC22a_54	NC75	-14700	2100	-280	290	314	56	53	14	2060	280	105	13	30.4	5.3	160	22	368	59	35.2	5.2	142	21	25.7	4	6.45	0.96	24.7	3.3	3.22	0.35	21.1	3.6	3.52	0.48	8.4	1.2	0.87	0.12	4.11	0.72	0.63	0.11	360	110	10.6	4.5	27.1	3.2
XNC22a_55	NC76	-17800	2800	-60	200	2.6	5.2	618	77	4780	730	360	100	7.2	2.2	313	95	1470	430	124	40	570	190	115	37	25.8	7.9	109	35	12.9	3.9	76	22	12.5	3.9	28.4	8.8	3.52	0.96	18.3	5.3	2.57	0.7	1040	370	24.7	8.9	24.3	2.5
XNC22a_56	NC77	-17500	1800	50	130	269	36	61	14	2020	150	236	33	54.4	6.8	297	47	740	100	70	11	260	38	43.8	5.7	13.4	2	55.5	8.3	6.65	0.86	41.8	5	6.93	0.81	17	2	1.74	0.23	8.3	1	1.15	0.14	176	69	12.7	3.6	31.3	2.9
XNC22a_57	NC78	-16900	3800	-400	410	271	64	83	20	2250	380	305	50	58.6	9.9	344	56	890	140	72.9	9.6	344	53	52.9	8.8	15	2.6	56	10	8.7	1.4	47.1	7.7	8.4	1.3	19.8	3.1	1.97	0.27	9.6	1.4	1.27	0.24	730	200	22.2	5.7	27.2	4
XNC22a_58	NC79	-18500	1700	20	120	281	40	71	10	2100	180	268	26	54.4	6.1	330	30	873	84	82	9.8	323	35	55.3	5.6	15.7	1.6	59.4	6.6	7.91	0.8	45.1	3.7	7.92	0.79	19.1	1.8	1.82	0.19	9.31	0.83	1.16	0.12	326	79	14.3	2.7	28.4	2.4
XNC22a_59	NC80	-15300	1100	39	95	280	30	56.4	8.9	1910	130	185	14	44.9	3.6	264	20	623	42	54.5	3.4	219	14	39.9	2.9	10.06	0.61	41.7	3.2	5.42	0.35	32	2.1	6.27	0.39	14.39	0.96	1.48	0.14	7.18	0.56	1.021	0.09	551	91	13.2	3	26.4	1.7
XNC22a_60	NC81	-15400	2300	-630	540	257	52	73	27	2400	300	348	43	60	11	397	49	1070	140	97	16	403	69	75	14	19	2.6	66	11	9.2	1.4	56.3	8.4	10	1.7	25.6	4.3	2.55	0.42	10.6	1.7	1.36	0.28	420	110	20.5	7.2	29.2	4.1
XNC22a_61	NC82	-20600	5100	-310	370	291	77	73	23	2130	400	313	59	52	10	357	36	1080	170	102	18	435	83	67	11	18.6	2.7	69	10	8.63	0.89	55.2	8.1	10.2	1.6	24.2	2.7	2.15	0.28	10.3	2.4	1.37	0.22	610	140	14.4	3.8	27.3	5
XNC22a_62	NC83	-18500	1500	-50	110	4.4	3.1	480	46	4810	450	278	42	17.9	2	425	50	850	100	58.2	9.1	235	33	37.6	5.6	9.2	1.4	42.3	5.6	4.81	0.7	27.6	3.5	5.93	0.88	14.6	2	1.97	0.27	10.7	1.4	1.77	0.25	126	61	161	18	158	17
XNC22a_63	NC84	-18600	2200	30	120	15.6	8.2	765	74	4190	330	930	160	31.6	7.3	1350	240	4390	820	280	45	1110	170	212	33	43.4	5.9	199	33	22.6	3.7	137	23	25.3	4.2	67	12	8.8	1.6	48.1	8.9	7.3	1.3	360	130	144	19	136	15
XNC22a_64	NC85	-19000	1300	-40	120	300	47	80	13	2100	140	290	17	58.5	4.6	368	20	882	60	83.4	5.8	331	23	57.5	3.9	15.3	1	62	4.2	8.17	0.57	48.7	2.9	8.99	0.5	21	1.2	2.1	0.19	10.49	0.75	1.46	0.11	560	130	13	3.1	29.1	1.9
XNC22a_65	NC86	-13300	2400	-590	310	281	85	86	20	2130	340	290	52	55.3	7.7	349	59	920	160	85	15	327	49	52.3	8.4	18.4	3.5	66	13	8.7	1.3	50.3	8.1	8.3	1.3	22.4	3.9	2.06	0.46	9.8	2	1.36	0.25	380	130	7.6	5.2	24.7	3.7
XNC22a_66	NC87	-13800	2300	-1040	690	333	65	56	44	2430	410	238	33	54	11	288	38	760	110	66.6	8.2	307	55	53.4	8.6	13.9	2.1	53.5	8.4	6.45	0.82	42.5	6.2	7.4	1.1	20.4	3.8	1.79	0.29	7.9	1.2	1.1	0.19	416	98	27	11	31.3	3.8
XNC22a_67	NC88	-14700	1100	-90	150	277	35	65	20	2050	130	197	23	41.8	4.4	248	24	624	56	57.8	5.5	221	22	40.3	3.9	10.9	1.2	41	4.3	5.64	0.6	32.4	3.2	6.01	0.57	14	1.3	1.34	0.12	6.83	0.74	0.949	0.095	260	100	17.3	4.6	25.7	1.7
XNC22a_68	NC89	-13300	2600	-820	780	187	38	71	35	2080	380	306	59	51	11	422	78	1160	260	92	17	343	55	69	13	20	3.8	63	9	8.7	1.7	55	13	10.1	1.8	20.3	3.1	2.09	0.5	9.1	1.5	1.31	0.27	480	170	12.8	7.3	20.9	3.1
XNC22a_69	NC90	-15600	2000	80	120	276	34	76	15	2100	220	254	30	45.1	5.3	291	30	770	98	74.8	8.8	273	26	48.9	7	14.1	1.8	50.8	5.5	6.75	0.74	40.3	3.9	7.11	0.78	17.9	2.1	1.88	0.22	8.52	0.96	1.09	0.12	356	88	16.8	4.7	28	2.9
XNC22a_70	NC91	-18500	3100	-540	470	95	27	167	27	2130	290	374	46	76	10	451	68	1150	180	95	13	388	54	66.1	7.8	18.8	2.5	73	11	9.6	1.2	60.1	8.3	11.3	1.6	26.2	3.5	2.46	0.33	12.5	1.9	1.69	0.23	1620	260	29	11	24.2	3
XNC22a_71	NC92	-17100	1500	44	91	313	27	65	11	2010	130	206	15	43.7	4.6	266	20	649	45	60	4.3	238	15	41.8	3.6	11.54	0.83	44	3	5.87	0.41	36.7	3	6.4	0.55	15.1	1.1	1.52	0.11	7.35	0.54	1.012	0.083	313	91	13.5	3.2	25.3	1.5
XNC22a_72	NC93	-16000	2800	-50	230	191	32	91	28	2150	580	331	73	51	11	358	74	990	210	98	21	316	61	62	8.8	19.4	4.1	61	16	9.3	1.9	48	11	9.2	1.9	20	3.5	2.13	0.38	10.3	2.2	1.32	0.27	450	200	9.3	5.6	25.7	4
XNC22a_73	NC94	-16300	1300	-160	210	311	40	81	14	2080	150	262	20	63.1	6	325	23	877	86	73.8	6.6	300	25	51.4	4.3	13.9	1.3	57	4.4	7.4	0.62	44.5	3.6	8.27	0.72	18.3	1.5	2.06	0.18	8.84	0.95	1.27	0.11	442	94	13.3	3.8	25.8	1.7
XNC22a_74	NC95	-18600	1400	-10	120	8.6	5.3	403	31	4550	350	295	78	14.4	3.4	337	85	1240	340	120	35	520	150	116	33	24	6.9	96	28	12.1	3.4	65	19	11.3	3.2	26	6.5	3.22	0.81	15.9	4.1	2.37	0.59	510	160	27.4	8	27.2	4.3
XNC22a_75	NC96	-15900	1500	-340	310	107	28	226	27	3410	300	91	12	162	15	116	18	247	44	21.2	4.5	85	17	16.5	3.2	4.15	0.82	17.2	3.6	2.14	0.36	12.6	2	2.44	0.37	7.2	1.3	0.83	0.11	4.82	0.68	0.8	0.1	266	68	94	13	94	10
XNC22a_76	NC97	-18100	1800	-140	130	216	29	63	12	2140	160	270	22	55.3	5.1	346	30	872	74	81.8	6.5	308	25	58.8	5.8	15.3	1.5	56.8	4.2	8.21	0.66	47.8	4.3	8.79	0.79	21.8	1.9	2.14	0.22	10.1	1	1.37	0.13	364	70	13	2.6	26.2	2.1
XNC22a_77	NC98	-17200	3400	-430	320	256	78	84	23	2350	350	366	79	61	13	510	120	1220	240	116	24	404	81	83	21	21.4	5.2	73	11	10.1	2	63	13	9.9	2	23.8	5.2	2.38	0.45	11.1	2	1.35	0.31	520	160	20.2	7.5	37.1	6
XNC22a_78	NC99	-16300	1900	-200	290	304	67	83	32	2330	270	311	43	67	12	396	43	1050	140	103	18	359	41	59.8	8.6	17.8	2.5	65.9	6.4	8.7	1.2	51.7	4.9	9.8	1.3	21.9	2.8	2.49	0.36	11.2	1.7	1.4	0.24	810	180	19.6	6.1	32.1	4
XNC22a_79	NC100	-12500	1900	-760	540	202	50	61	28	1960	280	240	42	39.7	7.7	284	40	746	94	71	11	279	38	46.7	8.8	12.4	2	49	7.9	6.44	0.88	39.3	6.3	7.3	1.3	16.3	2.2	1.56	0.3	9.2	1.9	0.92	0.16	350	140	12	6.1	21.5	2.6
XNC22a_80	NC101	-18200	1500	-80	140	265	34	79	14	2050	120	254	18	62.7	4.7	338	26	899	77	81.6	6.6	296	23	54.6	5.2	15.8	1.4	58.3	5	7.79	0.64	46.4	3.7	8.24	0.64	19	1.5	1.89	0.15	9.6	0.75	1.33	0.13	330	79	18.9	4.5	30.7	2.2
XNC22a_81	NC102	-15300	1200	10	120	293	34	66	15	2060	160	216	19	50.3	5	274	28	667	65	59.8	5.5	229	22	39.1	3	11.7	1.2	43.3	3.5	6.24	0.63	36.9	3.4	7.3	0.81	16.7	1.6	1.66	0.2	7.96	0.78	1.1	0.13	640	120	19	3.8	29.3	2.1
XNC22a_82	NC103	-18200	1900	-60	150	128	24	111	19	2210	210	384	38	107	14	434	49	1230	120	131	15	497	65	111	11	24.9	2.3	104	11	13.3	1.3	77	8.6	12.7	1.1	28.6	2.4	3.09	0.37	14.5	1.7	1.91	0.23	1180	260	20.4	4.4	31.3	2.9
XNC22a_83	NC104	-17500	5200	60	280	320	130	101	32	2220	510	298	60	64	13	323	78	890	210	89	24	296	46	47.9	9.6	16.4	3.1	61	16	8.4	2	43.1	8.5	7.6	1.4	19.1	3.3	2.41	0.63	10.6	2.9	1.41	0.3	910	270	12.9	6.9	27.2	5.3
XNC22a_84	NC105	-17200	1500	-120	150	214	34	64	13	2170	170	305	26	51.6	6.2	398	33	1051	94	94.9	7.6	372	36	69.1	7.2	19.1	2	68.3	6	9.28	0.86	53.1	4	9.96	0.91	22.1	2.2	2.28	0.22	9.3	0.74	1.29	0.11	230	67	18.6	4.3	28.8	2.7
XNC22a_85	NC106	-18700	2000	-120	140	283	37	92	18	2400	240	316	34	58.4	6.7	399	45	970	110	93.8	8.4	342	35	65.5	7.1	17.5	1.8	66.6	7.2	9.26	0.8	53.3	5.2	9.79	0.92	22.1	2.3	2.38	0.26	11.2	1.1	1.55	0.15	730	130	19.1	4.6	28.3	2.3
XSG5a_01	SG5	-22000	1800	-20	130	5.8	3.6	663	53	334	32	2420	180	19.5	4.1	848	66	2890	240	396	33	1920	170	486	45	69	11	425	34	69.2	5.3	448	32	88	6	255	19	35.9	2.5	206	14	25.1	2	205	69	14.6	3.5	11.74	0.96
XSG5a_02	SG6	-22100	1900	-80	140	0	1	135	14	566	45	384	31	0	1	0.47	0.13	1.64	0.21	0.27	0.086	2.16	0.56	1.54	0.34	0.572	0.089	6.17	0.67	2.24	0.21	30.1	2.4	11.54	0.87	49.8	4.1	7.85	0.62	43.1	3.9	4.86	0.4	-11	27	4.6	1.9	5.51	0.4
XSG5a_03	SG7	-23000	2400	-340	200	28.7	9.6	382	46	909	96	607	64	17.1	2.6	1310	110	3110	270	373	33	1650	160	266	21	34.1	3.2	209	19	24.7	2.3	126	11	21.9	2.1	48.2	3.8	5.44	0.55	27.5	2	3.59	0.37	11	35	2.3	1.4	3.34	0.38
XSG5a_04	SG8	-24400	1700	-460	250	0.35	0.71	473	35	409	29	80	8.3	1.64	0.9	6.4	2.2	34.8	9.2	7.9	1.7	44.7	6.9	16	2.1	3.81	0.59	20.9	1.8	2.66	0.27	15.6	1.5	3.32	0.3	9.08	0.89	1.49	0.15	11	1	1.74	0.18	63	52	-0.395	0.037	1.19	0.11
XSG5a_05	SG9	-22500	2500	-20	140	2.3	2.3	833	84	575	53	907	87	11.6	2.7	62	10	240	40	36.9	6	200	33	77.7	9.5	24.2	2.7	118	12	22.2	2.3	155	14	34	3	92.3	8.7	12.2	1.1	74.6	7.3	12.2	1.1	59	43	5.8	2.3	8.45	0.77
XSG5a_06	SG10	-22700	2100	-100	130	2.2	2.2	259	21	1033	80	64.6	6.3	1.28	0.54	48.4	4.7	177	14	28.5	2.3	147	12	34.3	3.2	8.03	0.84	25	2.3	2.57	0.25	12.2	1.2	2.07	0.2	5.02	0.46	0.565	0.072	3.02	0.37	0.471	0.064	11	34	6.8	2.2	9.32	0.71
XSG5a_07	SG11	-22600	1700	-40	140	0	1	971	73	1860	130	2300	200	0	1	36.9	3.1	168	13	31.9	2.3	226	19	147	13	36.1	2.7	349	28	65.3	4.8	422	27	82.9	5.8	240	20	34.6	2.8	212	15	29.8	2.2	5	29	48.6	6.3	61.1	3.7
XSG5a_08	SG12	-20800	1700	30	100	0	1	225	19	2030	150	543	45	6.5	2.1	13.1	2.1	49.8	6.5	9.9	1.1	83.3	8.9	50.9	4.1	15.6	1.2	115.7	8.2	19.4	1.6	114.7	8.5	21.8	1.6	58.1	4.4	7.87	0.57	50.2	4.1	6.05	0.46	0	29	27.5	5	33	3.7
XSG5a_09	SG13	-23000	1800	-430	210	10	4.4	237	24	877	66	626	42	22.3	2.9	2030	150	4850	340	497	36	1910	130	315	23	21.1	1.9	231	18	26.6	2	142	10	23.3	1.7	52.8	4	5.88	0.42	30.7	2.4	3.68	0.28	-20	26	2	1.3	6.65	0.48
XSG5a_10	SG14	-20900	1900	-360	190	0	1	418	39	501	33	15.5	1.8	0.46	0.29	3.95	0.48	8.88	0.94	2.08	0.24	11.3	1.6	3.08	0.44	0.79	0.1	3.47	0.53	0.452	0.064	2.83	0.35	0.603	0.066	1.55	0.13	0.199	0.034	1.28	0.23	0.211	0.028	-19	26	4.1	1.6	4.82	0.42
XSG5a_11	SG15	-22300	2300	-120	220	26	13	459	67	1150	120	107	23	35.2	8	73	13	294	70	42.3	8.3	235	67	53	11	15.9	3.8	47	12	5.3	1.3	27.1	5.5	4.23	0.81	11.8	2.2	1.57	0.29	9.2	1.5	1.32	0.15	280	110	0.92	1.16	2.58	0.38
XSG5a_12	SG16	-22700	1900	80	100	8.1	4.3	296	29	585	44	72.9	7	0.79	0.4	26	2.2	79.3	6.1	17.2	1.4	111.1	9.4	28.5	2.5	8.1	0.79	25.8	2.1	2.82	0.26	15.4	1.3	2.62	0.23	6.87	0.57	0.922	0.086	4.77	0.43	0.815	0.088	-32	24	3	1.4	4.47	0.52
XSG5a_13	SG17	-23300	1900	-130	130	0	1	637	56	151	12	667	51	0.025	0.049	1.33	0.22	12.2	1.3	3.49	0.41	38.9	3.8	29.4	2.8	2.65	0.24	71.9	5	13.2	1.1	94.4	7.4	22.7	1.6	69.1	5.8	9	0.68	54	3.8	8.07	0.56	9	35	2.3	1.2	11.05	0.82
XSG5a_14	SG18	-20700	1500	-80	140	8.7	4.6	326	27	1452	98	586	63	11.2	1.7	45.6	4.7	185	17	33.6	3.9	204	22	71	7.6	10.5	1.1	94	10	14.5	1.6	92.7	9.9	19	1.9	58	6	7.64	0.8	44.5	4.2	6.1	0.61	-2	28	11.3	3.1	14.2	1.5
XSG5a_15	SG19	-19500	1600	-150	160	5.6	3.8	308	26	440	28	100.6	7.7	2.4	1.1	30.1	3.4	128	17	22.9	3	126	19	33.5	5.2	10.1	1.3	32.1	3.8	3.83	0.39	20.1	2	3.67	0.3	9.79	0.67	1.107	0.085	6.61	0.57	1.048	0.086	700	250	2.1	1.4	2.67	0.21
XSG5a_16	SG20	-21200	1500	-40	120	0	1	158	14	1123	72	457	25	0.52	0.27	14.3	1.6	50.5	6.2	8.55	0.96	61.6	7.2	24	2.3	6.8	0.79	44.6	3.7	8.65	0.59	67.1	4.3	16.9	1.1	52.2	3.3	6.97	0.44	37.1	2.4	4.33	0.33	-33	24	17.3	4.3	20	1.2
XSG5a_17	SG21	-18100	2400	-590	380	84	21	547	73	1490	160	179	25	16.8	4.5	588	68	1330	170	161	20	693	78	138	21	35	6	95	16	11.3	1.7	48.5	7.7	7.9	1.2	15.5	2.4	1.84	0.29	7.7	1.1	0.94	0.13	260	130	7.2	4.6	4.45	0.53
XSG5a_18	SG22	-21700	1700	-180	150	9.8	5.2	1136	73	510	38	789	56	17.7	2.3	3470	220	7370	540	740	52	2770	190	422	28	41	3.4	273	17	33.8	2.3	167	11	27.5	1.8	63.1	4.3	7.37	0.44	37.5	2.5	4.69	0.31	-32	24	3.3	1.4	4.46	0.32
XSG5a_19	SG23	-20100	1600	-70	130	23.5	7.8	26.8	8	1580	120	1073	82	157	13	650	44	3820	270	693	47	4010	300	1116	75	308	22	832	57	92	6.9	389	27	49.7	3.2	88.5	5.6	7.98	0.62	34.9	2.9	4.04	0.26	305	84	4.9	1.7	7.11	0.51
XSG5a_20	SG24	-19800	1400	-230	170	5	3.3	626	56	294	26	140	12	4.1	1.4	19.5	4.5	85	18	13.9	3	75	15	17.7	3.8	5.18	0.99	15.3	2.8	2.11	0.31	15.5	1.6	4.42	0.36	20	1.7	4.59	0.43	38.2	3.3	6.34	0.5	36	42	4.3	1.8	4.79	0.48
XSG5a_21	SG25	-21600	1300	-210	190	0	1	110	13	903	68	428	32	6.4	1.7	9.6	1.8	35.1	5.8	4.94	0.8	26.5	3.4	12.4	1.4	3.99	0.36	31.4	2.2	8.04	0.5	70.3	5.1	14.49	0.93	37.6	2.4	4.51	0.33	22.5	1.7	2.47	0.2	-22	25	18.9	4	18.18	0.89
XSG5a_22	SG26	-20500	1500	20	110	0	1	383	31	2110	150	83.2	7.5	0.38	0.24	27.2	2.5	145	11	25.9	2.1	154	12	34.1	3.5	9.09	0.7	24.2	2	2.65	0.23	12.6	1	2.4	0.21	6.64	0.68	0.936	0.094	6.28	0.63	1.177	0.099	44	42	3.9	1.8	5.37	0.34
XSG5a_23	SG27	-18900	3100	-60	220	89	29	354	58	504	59	1250	190	24.1	6.7	337	64	1210	170	193	30	1120	220	298	47	65.6	9.5	321	53	43	6.7	245	41	45.6	7.8	124	19	14.8	2.2	89	13	12.9	2	220	100	6.1	3.7	22.1	3.1
XSG5a_24	SG28	-20400	2000	70	140	8.2	5.2	151	17	1350	130	201	23	14.3	8.5	212	21	698	76	108	12	552	69	118	15	30.8	4.5	88	12	8.81	0.99	43.7	5.2	7.32	0.89	16.7	2.1	1.91	0.21	12.7	1.5	1.8	0.18	87	53	3.2	1.8	6.92	0.68
XSG5a_25	SG29	-22500	2000	0	120	0.49	0.98	440	37	467	38	707	55	2070	890	559	45	1420	110	180	14	766	62	141	12	11.8	1	131	10	17.5	1.2	112.6	8.8	24.2	2	78	6.8	12	1.1	81.8	7	13.7	1.1	-6	37	4.5	1.9	10.1	1.3
XSG5a_26	SG30	-23600	2000	20	130	0	1	411	33	136	11	1730	150	0	1	4.09	0.71	19.3	2.8	4.05	0.57	30.7	3.9	19.5	2.4	4.94	0.53	57.7	5.9	15.8	1.4	171	14	51.8	3.9	200	17	33.2	3.1	216	19	33.5	2.8	-19	28	19.5	4.3	23.7	1.8
XSG5a_27	SG31	-18900	1800	-450	220	18.2	6.9	245	23	4360	360	315	29	13.9	1.9	1790	150	3470	280	373	32	1390	120	192	16	44.5	3.8	130	10	14.8	1.3	71.3	6.3	12	1	25.7	2.1	2.85	0.28	14	1.3	1.78	0.16	15	37	2.6	1.5	2.39	0.2
XSG5a_28	SG32	-18500	1600	-320	220	80	23	448	42	723	50	438	36	43.1	4.8	108.9	9.8	491	44	78.3	6.7	437	39	126	11	27.3	2.7	114.1	8.5	16	1.3	90.8	8.2	16.3	1.4	44.5	3.6	6.02	0.6	33.8	3.3	4.97	0.43	126	65	35.5	5.4	35.9	5.3
XSG5a_29	SG33	-19500	1500	-40	140	3.4	3.1	286	27	625	46	285	23	0.98	0.48	413	34	1015	81	134	12	580	53	112	14	27.5	3.5	90.2	8.2	10.74	0.96	59.5	5.3	10.58	0.79	26.2	2.2	3.14	0.25	16	1.3	2.43	0.2	55	42	5.7	2.4	10.12	0.75
XSG5a_30	SG34	-22400	1700	-60	120	2.8	2.4	339	30	864	59	34.9	3.7	4.6	1.3	10.8	1.5	44	11	4.9	1.1	24.2	7.2	5.5	1.1	1.68	0.48	5.8	1.1	0.92	0.15	5.68	0.71	1.18	0.14	3.45	0.32	0.486	0.062	3.62	0.41	0.571	0.059	-5	27	2	1.3	2.59	0.22
XSG5a_31	SG35	-21900	1800	-180	140	134	15	402	30	1610	130	137	11	10.1	1.6	369	26	866	53	107.1	7.6	448	34	76.7	5.5	19.1	1.3	54.1	3.9	6.09	0.51	30.9	2.5	5.03	0.41	11.09	0.91	1.21	0.11	6.87	0.68	0.835	0.072	24	45	1.7	1.2	0.553	0.054
XSG5a_32	SG36	-21700	1800	-10	120	41	12	538	58	828	63	342	36	154	23	234	29	790	110	121	19	640	110	155	26	42.4	6.9	126	20	16.1	2.3	82	11	13.8	1.5	36.1	3.6	4.99	0.45	33.8	2.9	5.45	0.51	84	50	12.9	6	15.1	6.2
XSG5a_33	SG37	-22800	2000	-320	170	115	16	470	42	2270	190	201	17	14.8	2.1	636	55	1470	110	172	13	705	52	114.9	8.7	30.8	2.5	83.7	5.9	9.76	0.8	47.8	3.6	7.94	0.62	18.5	1.6	2.03	0.17	10.09	0.98	1.23	0.11	-35	24	-0.381	0.036	0.615	0.059
XSG5a_34	SG38	-24300	3300	100	240	477	79	135	33	1680	210	1610	190	1030	110	1340	160	6490	750	1050	120	5920	720	1570	190	436	52	1160	140	137	16	591	67	79.8	9.3	147	17	13.8	1.7	59.8	7.2	6.69	0.84	1260	140	25.1	7.3	30.3	3.5
XSG5a_35	SG39	-22500	1700	50	110	0	1	316	26	1810	150	250	19	0	1	58.4	9	155	23	18.7	2.8	81	10	20.1	2.4	5.1	0.61	31	3.4	4.92	0.46	35.4	3.2	8.48	0.78	24.1	2.2	3.34	0.35	20.8	2.1	3.26	0.27	-2	33	12.8	3.8	16.7	1.1
XSG5a_36	SG40	-21200	2100	-140	280	45	22	349	34	805	84	532	52	27.2	4.5	378	38	1600	140	248	28	1250	150	294	33	81.3	8	227	24	27.7	2.8	129	11	21.1	2	48.7	4.8	5.77	0.71	34.2	3.8	6.02	0.79	134	56	72	14	83	15
XSG5a_37	SG41	-22000	1500	-380	190	87	14	593	39	3460	210	208	14	14.4	1.7	1306	84	2510	170	258	17	948	62	128.9	8.6	32.4	2.5	84.6	5.1	9.25	0.57	47.7	2.8	7.93	0.58	18.22	0.97	2.25	0.18	11.4	0.84	1.51	0.1	-16	27	2.4	1.3	2.44	0.28
XSG5a_38	SG42	-21200	1700	-10	120	0.93	1.31	554	50	441	39	19.9	3	0	1	36.7	3.5	99.7	7.4	13.2	1.4	59.3	4.7	9.4	1.1	1.65	0.21	6.91	0.78	0.611	0.082	3.26	0.29	0.66	0.097	1.82	0.26	0.195	0.03	1.15	0.23	0.171	0.028	0	29	5.9	2.1	4.83	0.35
XSG5a_39	SG43	-21600	1400	10	110	5.8	4.2	306	23	141	14	2600	160	9.4	1.8	65	12	314	62	49.8	9.9	307	54	137	15	19.2	3.7	274	18	57.5	3.4	422	28	83.4	5.3	193	10	20.2	1	102.5	5.4	13.85	0.85	-2	31	4.5	1.9	26.5	1.7
XSG5a_40	SG44	-23500	1800	60	110	0	1	1000	60	941	68	129.7	9.5	1.2	1.3	3.22	0.42	11.3	1	1.99	0.28	13.4	1.9	6.44	0.93	3.21	0.35	12.5	1.1	2.22	0.19	18.3	1.4	4.42	0.33	13.4	1	1.76	0.18	10.65	0.9	1.84	0.13	40	42	0.65	0.91	1.17	0.1
XSG5a_41	SG45	-20100	1700	-10	110	0	1	404	30	164	14	2390	190	8.2	1.8	38.1	4.7	165	26	27.3	4.7	174	22	90.9	8.9	19.2	2.1	190	12	41.3	2.7	346	24	79.3	5.1	239	16	35.5	2.5	224	15	31.7	2.2	-13	27	2.1	1.2	20.5	1.4
XSG5a_42	SG46	-22300	1400	-80	130	8.1	4.6	629	42	296	31	1289	89	58.3	7	172	24	667	94	110	16	586	83	189	21	37.3	5.7	250	21	40.9	3.2	257	17	47.3	3.3	116.3	7.7	13.52	0.83	77.9	4.9	9.6	0.63	-32	24	8.8	2.9	8.8	0.69
XSG5a_43	SG47	-23000	1800	-600	220	0	1	226	27	128	11	2370	160	0.79	0.39	547	39	2090	150	288	20	1450	110	389	28	52.6	3	422	27	67.6	4.9	423	30	82.6	5.4	232	16	34.3	2.5	213	15	31.5	2.4	1	29	-0.413	0.04	3.41	0.23
XSG5a_44	SG48	-21000	1800	-100	130	0.96	1.34	346	33	842	67	101.7	9.1	0.98	0.49	515	43	1410	120	159	14	596	60	81.4	8.3	16.8	1.7	52.1	5.3	4.94	0.56	22.7	2.3	3.51	0.33	8.24	0.85	0.96	0.11	5.99	0.59	0.799	0.063	5	35	4.3	1.8	70.6	6
XSG5a_45	SG49	-23200	2000	20	120	0	1	91.9	9.6	246	19	1239	84	0	1	122.5	8.4	771	50	179	12	1200	78	347	23	67.6	4.8	329	21	42	2.6	241	15	46.5	3	122	7.6	15.6	1.1	85.3	5.3	11.54	0.71	17	31	5.9	2.2	10.62	0.64
XSG5a_46	SG50	-22300	2000	10	150	13.3	7.2	358	37	230	24	279	28	0.97	0.56	32	10	155	49	26.8	8.4	134	42	38	11	11.7	3.2	46.1	8.3	6.86	0.87	46.6	4.6	10.4	1	28.9	2.5	3.98	0.33	22.5	2	3.39	0.31	76	47	2.9	1.7	3.13	0.41
XSG5a_47	SG51	-23100	2100	-100	170	6.8	4.3	1015	70	984	75	416	29	0.51	0.3	53.4	4.1	231	16	39.8	2.7	237	15	70.1	4.8	18.24	0.99	87.5	6.5	11.62	0.95	73.1	5.5	14.5	1	40.6	2.9	5.53	0.46	36.2	2.7	6.14	0.46	30	38	4.7	2.1	4.8	0.33
XSG5a_48	SG52	-21500	1600	-130	130	25	8.7	195	21	2610	180	307	23	2.13	0.61	1170	84	2550	160	325	26	1320	81	213	16	40.1	3	137.2	9.6	14.5	1.1	70.5	5.4	11.87	0.92	27.1	1.7	3.01	0.22	17.4	1.4	2.34	0.18	-8	28	3.3	1.6	11.03	0.7
XSG5a_49	SG53	-21900	2000	-300	190	41	13	694	59	577	39	378	24	4.8	1.2	773	54	2310	150	297	21	1307	92	250	19	37.9	3.1	176	13	20.7	1.4	97.2	7.3	15	1.1	34.5	2.4	4.02	0.28	21.5	1.5	2.95	0.22	28	39	23.2	5.9	24.9	3.7
XSG5a_50	SG54	-23800	2100	120	100	3	2.6	250	23	322	23	879	73	6.6	1.6	883	91	1990	170	275	24	1239	92	227	16	25	2	222	17	27.5	1.8	157	10	32.2	2.7	83.1	6.3	11.05	0.89	62.3	4.5	9.15	0.82	-9	27	3.8	1.7	6.71	0.58
XSG5a_51	SG55	-19800	2400	-370	280	12.2	7.9	344	50	1083	91	173	26	28.1	8.5	112	21	443	83	63.1	9.8	321	51	83	12	22.7	3.7	67.4	9.5	9.3	1.7	44	7.8	7	1.2	17.1	2.8	1.71	0.25	10.3	2	1.45	0.19	166	99	17.1	5.7	12.6	1.5
XSG5a_52	SG56	-20000	2000	147	77	7.1	4.2	538	48	1930	190	2130	230	33.6	3.7	254	27	1250	140	229	25	1210	130	309	28	79.3	8.5	301	28	44.5	4	282	28	61.1	6.1	178	18	23.6	2.5	146	16	23.8	2.5	1	35	9.4	2.6	11.6	1.1
XSG5a_53	SG57	-18600	1500	-240	170	8.4	4.7	217	19	344	29	597	43	20.7	2.9	266	21	1273	94	217	16	1223	90	306	21	23.5	1.8	270	20	29.9	2.1	148	10	23.8	1.8	50.3	3.7	5.28	0.43	26.2	2.1	3.62	0.26	59	42	6.6	2.5	11.9	1.5
XSG5a_54	SG58	-23500	2200	-10	140	24.9	8.2	240	24	238	21	74.9	9.6	2.5	2.7	32	11	79	27	7.8	2.6	38	13	6.2	1.9	1.5	0.38	7.1	1.7	1.27	0.22	9.6	1.3	2.21	0.29	7.93	0.91	1.29	0.14	7.65	0.8	0.925	0.085	49	48	8.8	2.7	11	1.2
XSG5a_55	SG59	-22800	1700	-110	150	0	1	299	25	372	29	14.5	2.2	0.033	0.065	1.42	0.43	5.5	1.5	0.75	0.25	3.9	1.1	1.15	0.37	0.326	0.083	1.51	0.37	0.217	0.053	1.63	0.29	0.362	0.071	1.25	0.17	0.153	0.028	1.19	0.21	0.264	0.039	-34	24	2.7	1.5	2.4	0.24
XSG5a_56	SG60	-21800	1500	-40	120	0.57	1.14	288	28	3100	250	35.3	4.1	2.83	0.84	8.3	1	31.9	3.6	6.61	0.66	48.3	4.4	13.7	1.4	2.75	0.22	15.2	1.4	1.62	0.14	7.78	0.69	1.39	0.14	3.01	0.28	0.369	0.056	1.93	0.26	0.255	0.03	-21	27	3.2	1.4	2.63	0.18
XSG5a_57	SG61	-23700	1900	20	110	0.72	1.43	181	20	2870	230	59.2	4.8	0	1	17.1	1.4	75.3	5.9	15	1.4	96.3	7.3	28	2.5	7.29	0.68	28.3	2.5	2.49	0.22	12.6	1.1	1.94	0.18	4.75	0.44	0.556	0.071	3.28	0.28	0.534	0.042	8	29	2.7	1.5	4.13	0.32
XSG5a_58	SG62	-23600	2800	30	100	4.6	3.4	301	31	532	50	195	22	0.59	0.28	11.5	1.3	69.6	7.6	16.1	2	126	19	44.8	4.3	13.7	1.3	53.6	4.4	6.68	0.58	37.7	3.7	6.96	0.8	17.4	1.7	2.11	0.23	12.4	1.4	2.17	0.24	-4	28	2.8	1.5	34.8	3
XSG5a_59	SG63	-21700	2000	-40	120	0	1	379	36	6450	480	72.3	6.1	0	1	2.65	0.38	8.91	0.79	1.38	0.21	10.4	1.2	3.71	0.69	1.74	0.22	9.1	0.93	1.65	0.15	12.2	1.1	2.3	0.22	5.88	0.55	0.621	0.073	2.8	0.33	0.327	0.032	-3	29	15.4	2.9	15.8	1.2
XSG5a_60	SG64	-19800	1500	-230	180	3.1	2.6	472	42	285	21	264	21	15.1	4.3	32.9	3.7	150	17	26.9	2.7	165	13	50.4	5.1	8.4	0.97	65.7	5.4	8.77	0.67	50.6	3.4	9.87	0.68	26.9	1.9	3.13	0.2	17	1.2	2.25	0.21	-8	28	3.7	1.7	13.94	0.93
XSG5a_61	SG65	-21800	2100	-230	170	146	24	525	52	2110	200	222	21	11.3	1.6	790	74	1610	150	186	18	770	77	119	12	29.4	2.9	87.5	7.8	9.6	0.86	48.2	4.7	8.28	0.94	19.2	1.9	2.04	0.22	10.5	1.2	1.28	0.13	-32	24	1.4	1.1	0.74	0.076
XSG5a_62	SG66	-22200	2100	-40	150	43	11	146	15	940	72	969	90	481	45	829	78	3080	330	431	40	2120	180	521	51	141	12	404	37	51.8	4.7	265	24	41.8	3.8	90.7	7.8	10.46	0.98	52	5.1	6.51	0.58	46	39	3.1	1.8	9.87	0.78
XSG5a_63	SG67	-20900	1700	-390	190	90	15	656	57	2470	180	289	25	14	2.4	1230	120	2400	190	236	21	936	77	141	13	35.8	2.9	97.8	7.5	11.7	1.1	60.1	5.3	10.32	0.81	25.3	2.2	2.95	0.28	16.2	1.2	2.05	0.19	28	39	0.96	1.1	1.45	0.19
XSG5a_64	SG68	-22400	1500	0	110	0	1	418	30	1340	100	740	63	0	1	12.9	1.4	52.8	4.4	10.61	0.96	86.3	7.2	60.8	4.7	19.6	1.5	166	13	29.9	2.3	199	17	31.4	2.3	71.6	5.3	8.07	0.62	42	3.1	5.36	0.41	-35	24	5.7	2	9.13	0.64
XSG5a_65	SG69	-21000	1500	-190	180	3.5	2.8	161	18	1080	96	415	39	8.2	1.5	238	21	739	60	99.7	8.7	443	43	96.5	9.3	19.9	1.7	94.5	8.9	11.73	0.92	70.7	6.2	14.6	1.3	37.9	3.4	4.79	0.39	26.4	2.6	3.86	0.35	15	36	2.3	1.4	3	0.39
XSG5a_66	SG70	-22200	1700	-10	110	0	1	606	45	261	20	1020	72	9.6	7.5	10.2	1.3	32.2	3.5	5.53	0.71	28.8	3.1	11.6	1.2	4.87	0.36	26.1	2.1	7.18	0.59	89.4	7	31.4	2.3	124.7	9.9	20.9	1.4	136	11	18.8	1.3	24	31	2.8	1.6	5.04	0.35
XSG5a_67	SG71	-20600	1400	-260	180	295	34	215	16	3120	220	120.2	9.8	10	1.2	676	43	1337	92	156	10	618	45	88.9	7.1	22.4	1.4	63.4	5	6.01	0.4	29.7	1.7	4.45	0.33	9.75	0.71	1.09	0.1	4.81	0.36	0.595	0.046	-12	27	0.31	0.66	0.568	0.063
XSG5a_68	SG72	-23400	1800	-190	140	69	14	510	39	2080	150	251	18	12.9	1.5	868	61	1790	120	200	13	865	57	137.2	9.8	31.8	1.8	98.3	7.1	10.94	0.77	55.3	3.8	9.1	0.74	19.9	1.4	2.26	0.2	11.86	0.94	1.51	0.11	21	39	1.4	1.1	1.23	0.13
XSG5a_69	SG73	-22800	1800	-270	180	2.4	2.4	613	62	265	22	504	47	1.8	1.1	208	20	778	64	136	12	763	67	199	16	24.1	2	180	15	21.2	1.9	112.5	8.9	18	1.5	34.8	2.8	2.97	0.26	10.7	1.1	1.013	0.094	-23	26	2.5	1.4	5.04	0.68
XSG5a_70	SG74	-22700	1800	20	110	0	1	582	42	357	27	2180	190	1.73	0.52	1060	93	3320	310	464	43	2300	210	474	38	126	11	433	36	60.9	5.4	360	30	74	6.2	206	19	29.5	2.8	188	18	27.9	2.3	-32	24	3.4	1.6	22.2	1.9
XSG5a_71	SG75	-23100	2000	-30	120	1.6	2.2	573	54	560	49	277	22	10.8	2	214	19	554	46	72.4	5.4	386	31	79.4	6.8	28.5	2.4	84	7	9.44	0.8	56.4	4.9	10.36	0.77	26.4	1.9	3.22	0.31	17.3	1.6	2.7	0.23	-11	27	8	2.7	8.31	0.73
XSG5a_72	SG76	-21300	1900	-10	140	33	28	232	26	517	42	71.7	9.4	36.8	7.3	63.4	7.5	262	34	39.2	5.1	207	27	46	6.4	14.7	2.2	35.9	4.8	4.58	0.66	20.6	2.6	3.11	0.41	7.03	0.99	0.76	0.13	3.96	0.59	0.444	0.07	62	46	9.9	4	9.4	2.2
XSG5a_73	SG77	-21100	1700	-130	150	41	11	688	61	527	38	373	32	38.3	5	81.5	8.6	283	36	47.9	6.4	246	31	66.1	7.9	20	2.3	64.8	5.9	9.4	0.83	57.6	4.4	12.96	0.96	39.6	3.1	5.81	0.39	39.9	2.8	6.79	0.55	134	52	8.2	2.4	6.74	0.56
[truncated: 8 more columns]
